# Supplementary material for: Association of Body Composition, Physical Functioning, and Protein Intake in Adult Patients With Mitochondrial Diseases
Source: PubMed Central journal article supplement — JPEN J Parenter Enteral Nutr. 2020 Mar 19;45(1):165–74. doi: 10.1002/jpen.1826 (PMC7891597; doi:10.1002/jpen.1826), 2020-03-19
Supplement: JPEN-45-165-s003.pdf [file JPEN-45-165-s003.pdf]

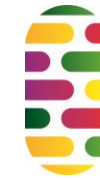

**Supplemental table 2**

*Correlations between body composition, physical functioning and protein intake*

**Table 1** *Correlations between body composition, physical functioning and protein intake in MD-patients and controls.*

|                       |                 | FFMI    |                 | FMI               |              | Arm LTMI        |                  | Leg LTMI |         | Protein intake |         |
|-----------------------|-----------------|---------|-----------------|-------------------|--------------|-----------------|------------------|----------|---------|----------------|---------|
|                       |                 | Patient | Control         | Patient           | Control      | Patient         | Control          | Patient  | Control | Patient        | Control |
| <b>HGS</b>            | <i>r</i>        | 0.30    | <b>0.67</b>     | <b>-0.61</b>      | <b>-0.49</b> | <b>0.53</b>     | <b>0.81</b>      |          |         | 0.39           | -0.14   |
|                       | <i>p</i> -value | 0.08    | <b>&lt;0.01</b> | <b>&lt;0.001</b>  | <b>0.002</b> | <b>&lt;0.01</b> | <b>&lt;0.001</b> |          |         | 0.02           | 0.42    |
|                       | n               | 37      | <b>37</b>       | <b>37</b>         | <b>37</b>    | <b>37</b>       | <b>37</b>        |          |         | 37             | 37      |
|                       |                 |         |                 |                   |              |                 |                  |          |         |                |         |
| <b>6MWT</b>           | <i>r</i>        | -0.26   | -0.25           | -0.19             | -0.25        |                 |                  | -0.1     | 0.22    | 0.35           | -0.26   |
|                       | <i>p</i> -value | 0.12    | 0.13            | 0.43              | 0.13         |                 |                  | 0.97     | 0.19    | 0.13           | 0.12    |
|                       | n               | 20      | 37              | 20                | 37           |                 |                  | 20       | 37      | 20             | 37      |
|                       |                 |         |                 |                   |              |                 |                  |          |         |                |         |
| <b>30SCT</b>          | <i>r</i>        | -0.42   | 0.01            | -0.29             | <b>0.41</b>  |                 |                  | -0.27    | -0.16   | <b>0.57</b>    | -0.12   |
|                       | <i>p</i> -value | 0.05    | 0.96            | 0.20              | <b>0.01</b>  |                 |                  | 0.23     | 0.35    | <b>0.006</b>   | 0.50    |
|                       | n               | 22      | 36              | 22                | <b>36</b>    |                 |                  | 22       | 36      | <b>22</b>      | 36      |
|                       |                 |         |                 |                   |              |                 |                  |          |         |                |         |
| <b>6MMT</b>           | <i>r</i>        | 0.25    | 0.20            | -0.07             | 0.22         |                 |                  |          |         | 0.45           | -0.21   |
|                       | <i>p</i> -value | 0.19    | 0.25            | 0.69              | 0.20         |                 |                  |          |         | 0.02           | 0.23    |
|                       | n               | 29      | 36              | 29                | 36           |                 |                  |          |         | 29             | 36      |
|                       |                 |         |                 |                   |              |                 |                  |          |         |                |         |
| <b>Protein intake</b> | <i>r</i>        | -0.19   | -0.13           | <b>-0.55</b>      | -0.39        | -0.04           | 0.06             |          | -0.03   |                |         |
|                       | <i>p</i> -value | 0.27    | 0.94            | <b>&lt;0.0001</b> | 0.02         | 0.84            | 0.71             |          | 0.85    |                |         |
|                       | n               | 37      | 37              | <b>37</b>         | 37           | 37              | 37               |          | 37      |                |         |

FFMI, fat free mass index (kg/m<sup>2</sup>); FMI, fat mass index (kg/m<sup>2</sup>); LTMI, lean tissue mass index (kg/m<sup>2</sup>); HGS, handgrip strength (kg); 6MWT, 6-minute walk test (total distance walked in meters); 30SCT, 30-second sit-to-stand test (total sit-to-stands movements); 6MMT, 6-minute mastication test (total chewing cycles); protein intake in g/kg/d; *r*, Spearman correlation for FMI, Protein intake and 6MWT, Pearson correlation for the rest. *P*-values <0.01 (in bold) were considered significant.
